# Supplementary material for: Clinical Characteristics, Antimicrobial Resistance, Virulence Genes and Multi-Locus Sequence Typing of Non-Typhoidal Salmonella Serovar Typhimurium and Enteritidis Strains Isolated from Patients in Chiang Mai, Thailand
Source: MDPI journal article supplement (doi:10.3390/microorganisms11102425), 2023-09-28
Supplement: s1 [file s1]

**Supplementary Table 1:** Classification of 24 antimicrobial agents in 13 antimicrobial classes and their abbreviations used in this study

| <b>Antimicrobial class</b>                                                                          | <b>Antimicrobial agent</b>                                            |
|-----------------------------------------------------------------------------------------------------|-----------------------------------------------------------------------|
| Aminoglycosides                                                                                     | Streptomycin (S), amikacin (AK)                                       |
| Antipseudomonal penicillins with $\beta$ -lactamase inhibitors                                      | Piperacillin/tazobactam (TZP)                                         |
| Carbapenems                                                                                         | Imipenem (IPM), doripenem (DOR), meropenem (MEM)                      |
| Non-extended spectrum cephalosporins; 1 <sup>st</sup> and 2 <sup>nd</sup> generation cephalosporins | Cefuroxime (CXM), ceftriaxone (CRO), cephazolin (KZ), ertapenem (ETP) |
| Extended-spectrum cephalosporins; 3 <sup>rd</sup> and 4 <sup>th</sup> generation cephalosporins     | Cefotaxime (CTX), cefepime (FEP), ceftazidime (CAZ)                   |
| Cephameycins                                                                                        | Cefoxitin (FOX)                                                       |
| Fluoroquinolones                                                                                    | Ciprofloxacin (CIP), nalidixic acid (NA), levofloxacin (LEV)          |
| Folate pathway inhibitors                                                                           | Trimethoprim/sulfamethoxazole (SXT)                                   |
| Monobactams                                                                                         | Aztreonam (ATM)                                                       |
| Penicillins                                                                                         | Ampicillin (AMP)                                                      |
| Penicillins with $\beta$ -lactamase inhibitors                                                      | Amoxicillin/clavulanic acid (AMC)                                     |
| Tetracyclines                                                                                       | Tetracycline (TE), doxycycline (DO)                                   |
| Macrolides                                                                                          | Azithromycin (AZM)                                                    |

**Supplementary Table 2:** Demographic and clinical data of hospitalized patients with stool or blood culture positive for *Salmonella enterica* Serovar Typhimurium and Enteritidis (1/8).

| Sample ID | Year | Source | Serovar | Age<br>(Year) | Gender | Sepsis | Hct (%)   | Leuk.<br>(cells/mm <sup>3</sup> ) | Neutro.<br>(cells/mm <sup>3</sup> ) | Lympho.<br>(cells/mm <sup>3</sup> ) | <i>spvB</i> | <i>ssel</i> | <i>sodC</i><br><i>l</i> | <i>rpoS</i> |
|-----------|------|--------|---------|---------------|--------|--------|-----------|-----------------------------------|-------------------------------------|-------------------------------------|-------------|-------------|-------------------------|-------------|
| CNTS005   | 2016 | blood  | STM     | 58            | M      | Yes    | normal    | increased                         | increased                           | decreased                           | -           | +           | +                       | +           |
| CNTS009   | 2016 | stool  | SE      | 66            | F      | Yes    | normal    | increased                         | increased                           | decreased                           | +           | +           | +                       | +           |
| CNTS010   | 2016 | blood  | SE      | 68            | M      | Yes    | increased | increased                         | decreased                           | decreased                           | +           | +           | +                       | +           |
| CNTS012   | 2016 | stool  | STM     | 66            | F      | Yes    | normal    | increased                         | increased                           | decreased                           | -           | +           | +                       | +           |
| CNTS016   | 2016 | stool  | STM     | 0.75          | F      | N/A    | N/A       | N/A                               | N/A                                 | N/A                                 | -           | +           | +                       | +           |
| CNTS017   | 2016 | stool  | STM     | 1             | M      | N/A    | N/A       | N/A                               | N/A                                 | N/A                                 | -           | +           | +                       | +           |
| CNTS019   | 2016 | stool  | STM     | 1             | M      | N/A    | N/A       | N/A                               | N/A                                 | N/A                                 | -           | +           | +                       | +           |
| CNTS020   | 2016 | stool  | SE      | 1             | M      | N/A    | N/A       | N/A                               | N/A                                 | N/A                                 | +           | +           | +                       | +           |
| CNTS023   | 2016 | stool  | STM     | 0.67          | F      | N/A    | N/A       | N/A                               | N/A                                 | N/A                                 | -           | +           | +                       | +           |
| CNTS024   | 2016 | blood  | SE      | 23            | M      | Yes    | decreased | decreased                         | increased                           | decreased                           | +           | +           | +                       | +           |
| CNTS028   | 2016 | blood  | STM     | 8             | M      | Yes    | decreased | increased                         | increased                           | decreased                           | -           | +           | +                       | +           |
| CNTS029   | 2016 | stool  | STM     | 1             | F      | N/A    | N/A       | N/A                               | N/A                                 | N/A                                 | -           | +           | +                       | +           |
| CNTS030   | 2016 | blood  | SE      | 60            | M      | Yes    | decreased | decreased                         | decreased                           | increased                           | +           | +           | +                       | +           |
| CNTS031   | 2016 | stool  | STM     | 1             | M      | No     | decreased | decreased                         | normal                              | normal                              | -           | +           | +                       | +           |
| CNTS032   | 2016 | stool  | STM     | 23            | M      | N/A    | N/A       | N/A                               | N/A                                 | N/A                                 | -           | +           | +                       | +           |
| CNTS037   | 2016 | stool  | STM     | 18            | F      | Yes    | decreased | increased                         | increased                           | decreased                           | +           | +           | +                       | +           |
| CNTS039   | 2016 | blood  | STM     | 71            | F      | N/A    | N/A       | N/A                               | N/A                                 | N/A                                 | -           | +           | +                       | +           |
| CNTS040   | 2017 | stool  | STM     | 0             | F      | N/A    | N/A       | N/A                               | N/A                                 | N/A                                 | -           | +           | +                       | +           |
| CNTS041   | 2017 | stool  | STM     | 1             | M      | Yes    | decreased | increased                         | normal                              | normal                              | -           | +           | +                       | +           |
| CNTS045   | 2017 | stool  | STM     | 9             | F      | Yes    | decreased | increased                         | increased                           | decreased                           | +           | +           | +                       | +           |

STM, *Salmonella enterica* Typhimurium; SE, *S. enterica* Enteritidis; M, male; F, female; N/A, Data not available; Hct, hematocrit (normal = 13-18%); Leuk, leukocyte (normal = 5000 – 10000 cells/mm<sup>3</sup>); Neutro, neutrophil (normal = 40-74 cells/mm<sup>3</sup>) and Lympho, lymphocyte (normal = 19-48 cells/mm<sup>3</sup>); +, presence; -, absence

**Supplementary Table 2:** Demographic and clinical data of hospitalized patients with stool or blood culture positive for *Salmonella enterica* Serovar Typhimurium and Enteritidis (2/8).

| Sample ID | Year | Source | Serovar | Age<br>(Year) | Gender | Sepsis | Hct (%)   | Leuk.<br>(cells/mm <sup>3</sup> ) | Neutro.<br>(cells/mm <sup>3</sup> ) | Lympho.<br>(cells/mm <sup>3</sup> ) | <i>spvB</i> | <i>ssel</i> | <i>sodC</i><br>/ | <i>rpoS</i> |
|-----------|------|--------|---------|---------------|--------|--------|-----------|-----------------------------------|-------------------------------------|-------------------------------------|-------------|-------------|------------------|-------------|
| CNTS046   | 2017 | Stool  | STM     | 1             | M      | Yes    | normal    | normal                            | normal                              | normal                              | -           | +           | +                | +           |
| CNTS047   | 2017 | Stool  | STM     | 1             | F      | Yes    | decreased | increased                         | normal                              | normal                              | -           | +           | +                | +           |
| CNTS048   | 2017 | Stool  | STM     | 59            | M      | Yes    | decreased | decreased                         | normal                              | normal                              | -           | -           | -                | +           |
| CNTS049   | 2017 | Blood  | STM     | 24            | M      | Yes    | decreased | decreased                         | normal                              | normal                              | +           | +           | +                | +           |
| CNTS050   | 2017 | Stool  | STM     | 72            | F      | N/A    | N/A       | N/A                               | N/A                                 | N/A                                 | -           | -           | -                | +           |
| CNTS053   | 2017 | Stool  | STM     | 64            | F      | Yes    | decreased | increased                         | increased                           | decreased                           | +           | +           | +                | +           |
| CNTS055   | 2017 | Stool  | STM     | 37            | M      | Yes    | decreased | decreased                         | decreased                           | increased                           | -           | -           | -                | +           |
| CNTS056   | 2017 | Blood  | STM     | 43            | M      | No     | decreased | normal                            | increased                           | decreased                           | -           | +           | +                | +           |
| CNTS058   | 2017 | Stool  | STM     | 2             | F      | Yes    | normal    | normal                            | increased                           | decreased                           | -           | +           | +                | +           |
| CNTS059   | 2017 | Stool  | SE      | 76            | F      | No     | decreased | normal                            | increased                           | decreased                           | +           | +           | +                | +           |
| CNTS060   | 2017 | Blood  | STM     | 43            | M      | Yes    | decreased | decreased                         | increased                           | decreased                           | -           | +           | +                | +           |
| CNTS064   | 2017 | Stool  | STM     | 1             | F      | N/A    | N/A       | N/A                               | N/A                                 | N/A                                 | -           | -           | -                | +           |
| CNTS065   | 2017 | Stool  | STM     | 64            | F      | Yes    | decreased | normal                            | increased                           | decreased                           | -           | +           | +                | +           |
| CNTS068   | 2017 | Stool  | STM     | 54            | M      | No     | normal    | increased                         | increased                           | decreased                           | -           | +           | +                | +           |
| CNTS069   | 2017 | Stool  | STM     | 54            | M      | No     | normal    | normal                            | increased                           | decreased                           | -           | +           | +                | +           |
| CNTS070   | 2017 | Stool  | STM     | 1             | M      | Yes    | decreased | normal                            | normal                              | normal                              | -           | +           | +                | +           |
| CNTS071   | 2017 | Stool  | STM     | 1             | F      | N/A    | N/A       | N/A                               | N/A                                 | N/A                                 | -           | +           | +                | +           |
| CNTS073   | 2017 | Stool  | STM     | 1             | M      | Yes    | decreased | increased                         | increased                           | decreased                           | -           | +           | +                | +           |
| CNTS074   | 2017 | Stool  | SE      | 23            | F      | Yes    | decreased | increased                         | increased                           | decreased                           | +           | +           | +                | +           |
| CNTS075   | 2017 | Stool  | STM     | 62            | F      | Yes    | decreased | normal                            | increased                           | decreased                           | -           | +           | +                | +           |

STM, *Salmonella enterica* Typhimurium; SE, *S. enterica* Enteritidis; M, male; F, female; N/A, Data not available; Hct, hematocrit (normal = 13-18%); Leuk, leukocyte (normal = 5000 – 10000 cells/mm<sup>3</sup>); Neutro, neutrophil (normal = 40-74 cells/mm<sup>3</sup>) and Lympho, lymphocyte (normal = 19-48 cells/mm<sup>3</sup>); +, presence; -, absence

**Supplementary Table 2:** Demographic and clinical data of hospitalized patients with stool or blood culture positive for *Salmonella enterica* Serovar Typhimurium and Enteritidis (3/8).

| Sample ID | Year | Source | Serovar | Age<br>(Year) | Gender | Sepsis | Hct (%)   | Leuk.<br>(cells/mm <sup>3</sup> ) | Neutro.<br>(cells/mm <sup>3</sup> ) | Lympho.<br>(cells/mm <sup>3</sup> ) | <i>spvB</i> | <i>ssel</i> | <i>sodC</i><br>/ | <i>rpoS</i> |
|-----------|------|--------|---------|---------------|--------|--------|-----------|-----------------------------------|-------------------------------------|-------------------------------------|-------------|-------------|------------------|-------------|
| CNTS078   | 2017 | Stool  | STM     | 1             | M      | N/A    | N/A       | N/A                               | N/A                                 | N/A                                 | -           | +           | +                | +           |
| CNTS080   | 2017 | Stool  | STM     | 0             | F      | No     | decreased | normal                            | normal                              | normal                              | -           | +           | +                | +           |
| CNTS081   | 2017 | Stool  | STM     | 60            | M      | No     | normal    | normal                            | normal                              | normal                              | -           | -           | +                | +           |
| CNTS083   | 2017 | Stool  | STM     | 2             | F      | N/A    | N/A       | N/A                               | N/A                                 | N/A                                 | -           | +           | +                | +           |
| CNTS085   | 2017 | Stool  | STM     | 3             | M      | No     | normal    | normal                            | decreased                           | increased                           | -           | -           | -                | +           |
| CNTS086   | 2017 | Stool  | STM     | 41            | F      | N/A    | N/A       | N/A                               | N/A                                 | N/A                                 | -           | +           | +                | +           |
| CNTS089   | 2017 | Stool  | STM     | 1             | M      | N/A    | N/A       | N/A                               | N/A                                 | N/A                                 | -           | +           | +                | +           |
| CNTS090   | 2017 | Blood  | STM     | 2             | F      | No     | decreased | decreased                         | decreased                           | increased                           | -           | +           | +                | +           |
| CNTS091   | 2017 | Stool  | STM     | N/A           | N/A    | N/A    | N/A       | N/A                               | N/A                                 | N/A                                 | -           | -           | +                | +           |
| CNTS093   | 2017 | Stool  | STM     | 41            | M      | N/A    | N/A       | N/A                               | N/A                                 | N/A                                 | -           | -           | -                | +           |
| CNTS094   | 2017 | Stool  | STM     | 26            | M      | N/A    | N/A       | N/A                               | N/A                                 | N/A                                 | -           | -           | +                | +           |
| CNTS097   | 2017 | Stool  | STM     | 0             | F      | Yes    | decreased | increased                         | increased                           | decreased                           | -           | -           | +                | +           |
| CNTS098   | 2017 | Stool  | STM     | 72            | M      | Yes    | decreased | increased                         | normal                              | normal                              | -           | -           | +                | +           |
| CNTS099   | 2017 | Stool  | STM     | 69            | M      | No     | decreased | normal                            | normal                              | decreased                           | -           | -           | -                | +           |
| CNTS100   | 2017 | Stool  | STM     | 4             | F      | No     | N/A       | N/A                               | N/A                                 | N/A                                 | -           | +           | +                | +           |
| CNTS101   | 2017 | Stool  | STM     | 82            | F      | Yes    | decreased | normal                            | increased                           | decreased                           | -           | -           | -                | +           |
| CNTS103   | 2017 | Stool  | STM     | 72            | M      | Yes    | decreased | increased                         | normal                              | normal                              | -           | -           | +                | +           |
| CNTS105   | 2017 | Stool  | SE      | 26            | M      | No     | normal    | normal                            | normal                              | normal                              | +           | +           | +                | +           |
| CNTS107   | 2017 | Stool  | STM     | 69            | M      | No     | decreased | normal                            | normal                              | decreased                           | -           | -           | -                | +           |
| CNTS109   | 2018 | Stool  | SE      | 10            | M      | No     | decreased | increased                         | increased                           | decreased                           | +           | +           | +                | +           |

STM, *Salmonella enterica* Typhimurium; SE, *S. enterica* Enteritidis; M, male; F, female; N/A, Data not available; Hct, hematocrit (normal = 13-18%); Leuk, leukocyte (normal = 5000 – 10000 cells/mm<sup>3</sup>); Neutro, neutrophil (normal = 40-74 cells/mm<sup>3</sup>) and Lympho, lymphocyte (normal = 19-48 cells/mm<sup>3</sup>); +, presence; -, absence

**Supplementary Table 2:** Demographic and clinical data of hospitalized patients with stool or blood culture positive for *Salmonella enterica* Serovar Typhimurium and Enteritidis (4/8).

| Sample ID | Year | Source | Serovar | Age<br>(Year) | Gender | Sepsis | Hct (%)   | Leuk.<br>(cells/mm <sup>3</sup> ) | Neutro.<br>(cells/mm <sup>3</sup> ) | Lympho.<br>(cells/mm <sup>3</sup> ) | <i>spvB</i> | <i>ssel</i> | <i>sodC</i><br>/ | <i>rpoS</i> |
|-----------|------|--------|---------|---------------|--------|--------|-----------|-----------------------------------|-------------------------------------|-------------------------------------|-------------|-------------|------------------|-------------|
| CNTS112   | 2018 | Stool  | SE      | 41            | F      | No     | decreased | normal                            | increased                           | decreased                           | +           | +           | +                | +           |
| CNTS113   | 2018 | Stool  | STM     | 57            | F      | N/A    | N/A       | N/A                               | N/A                                 | N/A                                 | -           | -           | -                | +           |
| CNTS114   | 2018 | Stool  | STM     | 2             | M      | Yes    | decreased | increased                         | normal                              | normal                              | -           | -           | +                | +           |
| CNTS115   | 2018 | Blood  | SE      | 59            | F      | Yes    | normal    | normal                            | increased                           | decreased                           | +           | +           | +                | +           |
| CNTS118   | 2018 | Stool  | STM     | N/A           | N/A    | N/A    | N/A       | N/A                               | N/A                                 | N/A                                 | -           | +           | +                | +           |
| CNTS119   | 2018 | Stool  | STM     | 2             | F      | No     | decreased | decreased                         | decreased                           | increased                           | -           | +           | +                | +           |
| CNTS123   | 2018 | Stool  | STM     | 1             | M      | N/A    | N/A       | N/A                               | N/A                                 | N/A                                 | -           | +           | +                | +           |
| CNTS125   | 2018 | Stool  | STM     | 38            | M      | Yes    | decreased | decreased                         | normal                              | normal                              | -           | -           | +                | +           |
| CNTS126   | 2018 | Stool  | STM     | 35            | F      | Yes    | decreased | normal                            | normal                              | normal                              | -           | -           | -                | +           |
| CNTS133   | 2018 | Stool  | STM     | N/A           | M      | No     | decreased | normal                            | normal                              | decreased                           | -           | +           | +                | +           |
| CNTS135   | 2018 | Stool  | STM     | 8             | M      | No     | decreased | normal                            | increased                           | decreased                           | -           | +           | +                | +           |
| CNTS139   | 2018 | Stool  | STM     | 6             | F      | Yes    | decreased | decreased                         | normal                              | decreased                           | -           | +           | +                | +           |
| CNTS141   | 2018 | Stool  | STM     | 30            | M      | N/A    | N/A       | N/A                               | N/A                                 | N/A                                 | -           | -           | -                | +           |
| CNTS144   | 2018 | Stool  | STM     | 66            | F      | Yes    | decreased | increased                         | increased                           | decreased                           | -           | -           | +                | +           |
| CNTS147   | 2018 | Stool  | STM     | 1             | M      | Yes    | normal    | increased                         | increased                           | decreased                           | -           | +           | +                | +           |
| CNTS156   | 2018 | Stool  | STM     | 52            | M      | N/A    | N/A       | N/A                               | N/A                                 | N/A                                 | -           | -           | -                | +           |
| CNTS161   | 2018 | Stool  | SE      | 22            | M      | No     | normal    | normal                            | normal                              | normal                              | +           | +           | +                | +           |
| CNTS163   | 2018 | Stool  | STM     | 65            | F      | N/A    | N/A       | N/A                               | N/A                                 | N/A                                 | -           | +           | +                | +           |
| CNTS167   | 2018 | Stool  | STM     | 1             | M      | N/A    | N/A       | N/A                               | N/A                                 | N/A                                 | -           | +           | +                | +           |
| CNTS171   | 2018 | Stool  | STM     | 1             | M      | N/A    | N/A       | N/A                               | N/A                                 | N/A                                 | -           | +           | +                | +           |

STM, *Salmonella enterica* Typhimurium; SE, *S. enterica* Enteritidis; M, male; F, female; N/A, Data not available; Hct, hematocrit (normal = 13-18%); Leuk, leukocyte (normal = 5000 – 10000 cells/mm<sup>3</sup>); Neutro, neutrophil (normal = 40-74 cells/mm<sup>3</sup>) and Lympho, lymphocyte (normal = 19-48 cells/mm<sup>3</sup>); +, presence; -, absence

**Supplementary Table 2:** Demographic and clinical data of hospitalized patients with stool or blood culture positive for *Salmonella enterica* Serovar Typhimurium and Enteritidis (5/8).

| Sample ID | Year | Source | Serovar | Age<br>(Year) | Gender | Sepsis | Hct (%)   | Leuk.<br>(cells/mm <sup>3</sup> ) | Neutro.<br>(cells/mm <sup>3</sup> ) | Lympho.<br>(cells/mm <sup>3</sup> ) | <i>spvB</i> | <i>ssel</i> | <i>sodC</i><br><i>I</i> | <i>rpoS</i> |
|-----------|------|--------|---------|---------------|--------|--------|-----------|-----------------------------------|-------------------------------------|-------------------------------------|-------------|-------------|-------------------------|-------------|
| CNTS172   | 2018 | Stool  | STM     | 23            | M      | No     | decreased | normal                            | normal                              | decreased                           | -           | +           | +                       | +           |
| CNTS174   | 2018 | Stool  | STM     | 1             | M      | N/A    | N/A       | N/A                               | N/A                                 | N/A                                 | -           | +           | +                       | +           |
| CNTS177   | 2018 | Stool  | SE      | 19            | M      | No     | normal    | normal                            | increased                           | decreased                           | +           | +           | +                       | +           |
| CNTS182   | 2018 | Stool  | SE      | 62            | M      | Yes    | normal    | decreased                         | normal                              | normal                              | +           | +           | +                       | +           |
| CNTS183   | 2018 | Stool  | STM     | 93            | F      | No     | decreased | normal                            | increased                           | decreased                           | -           | +           | +                       | +           |
| CNTS185   | 2018 | Stool  | STM     | 79            | M      | No     | decreased | normal                            | normal                              | normal                              | -           | +           | +                       | +           |
| CNTS191   | 2018 | Stool  | SE      | 53            | F      | N/A    | N/A       | N/A                               | N/A                                 | N/A                                 | +           | +           | +                       | +           |
| CNTS194   | 2018 | Stool  | SE      | 2             | M      | N/A    | N/A       | N/A                               | N/A                                 | N/A                                 | +           | +           | +                       | +           |
| CNTS195   | 2018 | Stool  | STM     | 1             | M      | No     | decreased | normal                            | normal                              | normal                              | -           | +           | +                       | +           |
| CNTS199   | 2018 | Stool  | STM     | 2             | M      | No     | decreased | normal                            | normal                              | normal                              | -           | +           | +                       | +           |
| CNTS200   | 2018 | Stool  | SE      | 78            | F      | Yes    | decreased | increased                         | increased                           | decreased                           | -           | +           | +                       | +           |
| CNTS206   | 2018 | Stool  | STM     | 1             | M      | Yes    | decreased | increased                         | decreased                           | increased                           | -           | +           | +                       | +           |
| CNTS209   | 2018 | Blood  | STM     | 76            | F      | Yes    | decreased | increased                         | increased                           | decreased                           | -           | +           | +                       | +           |
| CNTS210   | 2018 | Stool  | SE      | 31            | F      | N/A    | N/A       | N/A                               | N/A                                 | N/A                                 | -           | +           | +                       | +           |
| CNTS214   | 2018 | Stool  | STM     | 1             | M      | N/A    | N/A       | N/A                               | N/A                                 | N/A                                 | -           | +           | +                       | +           |
| CNTS219   | 2018 | Stool  | STM     | 1             | F      | N/A    | N/A       | N/A                               | N/A                                 | N/A                                 | -           | +           | +                       | +           |
| CNTS222   | 2018 | Stool  | STM     | 54            | M      | N/A    | N/A       | N/A                               | N/A                                 | N/A                                 | -           | +           | +                       | +           |
| CNTS226   | 2018 | Stool  | STM     | 1             | F      | No     | decreased | normal                            | normal                              | increased                           | -           | -           | -                       | +           |
| CNTS227   | 2018 | Stool  | STM     | 24            | F      | No     | normal    | normal                            | normal                              | normal                              | -           | +           | +                       | +           |
| CNTS230   | 2018 | Stool  | SE      | 42            | F      | N/A    | N/A       | N/A                               | N/A                                 | N/A                                 | -           | +           | +                       | +           |

STM, *Salmonella enterica* Typhimurium; SE, *S. enterica* Enteritidis; M, male; F, female; N/A, Data not available; Hct, hematocrit (normal = 13-18%); Leuk, leukocyte (normal = 5000 – 10000 cells/mm<sup>3</sup>); Neutro, neutrophil (normal = 40-74 cells/mm<sup>3</sup>) and Lympho, lymphocyte (normal = 19-48 cells/mm<sup>3</sup>); +, presence; -, absence

**Supplementary Table 2:** Demographic and clinical data of hospitalized patients with stool or blood culture positive for *Salmonella enterica* Serovar Typhimurium and Enteritidis (6/8).

| Sample ID | Year | Source | Serovar | Age<br>(Year) | Gender | Sepsis | Hct (%)   | Leuk.<br>(cells/mm <sup>3</sup> ) | Neutro.<br>(cells/mm <sup>3</sup> ) | Lympho.<br>(cells/mm <sup>3</sup> ) | <i>spvB</i> | <i>ssel</i> | <i>sodC</i><br>/ | <i>rpoS</i> |
|-----------|------|--------|---------|---------------|--------|--------|-----------|-----------------------------------|-------------------------------------|-------------------------------------|-------------|-------------|------------------|-------------|
| CNTS231   | 2018 | Stool  | STM     | 37            | F      | N/A    | N/A       | N/A                               | N/A                                 | N/A                                 | -           | -           | -                | +           |
| CNTS233   | 2018 | Stool  | STM     | 38            | M      | N/A    | N/A       | N/A                               | N/A                                 | N/A                                 | -           | +           | +                | +           |
| CNTS237   | 2018 | Stool  | STM     | 29            | M      | N/A    | N/A       | N/A                               | N/A                                 | N/A                                 | -           | -           | -                | +           |
| CNTS238   | 2018 | Stool  | STM     | 55            | F      | No     | decreased | normal                            | increased                           | decreased                           | -           | -           | -                | +           |
| CNTS240   | 2018 | Stool  | STM     | 27            | M      | No     | decreased | normal                            | normal                              | normal                              | -           | -           | -                | +           |
| CNTS246   | 2018 | Stool  | STM     | 65            | M      | No     | decreased | normal                            | normal                              | decreased                           | -           | +           | +                | +           |
| CNTS251   | 2018 | Stool  | SE      | 2             | F      | N/A    | N/A       | N/A                               | N/A                                 | N/A                                 | +           | +           | +                | +           |
| CNTS252   | 2018 | Stool  | STM     | 1             | M      | No     | decreased | normal                            | normal                              | normal                              | -           | +           | +                | +           |
| CNTS255   | 2019 | Stool  | STM     | 1             | M      | N/A    | N/A       | N/A                               | N/A                                 | N/A                                 | -           | +           | +                | +           |
| CNTS259   | 2019 | Stool  | STM     | 37            | M      | No     | normal    | normal                            | normal                              | normal                              | -           | +           | +                | +           |
| CNTS261   | 2019 | Blood  | SE      | 43            | F      | No     | decreased | normal                            | normal                              | normal                              | +           | +           | +                | +           |
| CNTS270   | 2020 | Stool  | SE      | 4             | M      | N/A    | N/A       | N/A                               | N/A                                 | N/A                                 | +           | +           | +                | +           |
| CNTS272   | 2020 | Stool  | SE      | 1             | F      | N/A    | N/A       | N/A                               | N/A                                 | N/A                                 | +           | +           | +                | +           |
| CNTS277   | 2020 | Stool  | STM     | 1             | F      | No     | decreased | increased                         | normal                              | normal                              | -           | +           | +                | +           |
| CNTS281   | 2020 | Stool  | STM     | 0.92          | M      | No     | decreased | increased                         | normal                              | normal                              | -           | +           | +                | +           |
| CNTS282   | 2020 | Stool  | STM     | 0.75          | M      | No     | decreased | increased                         | normal                              | normal                              | -           | +           | +                | +           |
| CNTS285   | 2020 | Stool  | STM     | 2             | M      | N/A    | N/A       | N/A                               | N/A                                 | N/A                                 | -           | +           | +                | +           |
| CNTS289   | 2020 | Stool  | STM     | 0.5           | F      | No     | decreased | increased                         | normal                              | normal                              | -           | +           | +                | +           |
| CNTS290   | 2020 | Stool  | STM     | 34            | F      | No     | decreased | normal                            | increased                           | decreased                           | -           | +           | +                | +           |
| CNTS291   | 2020 | Stool  | STM     | 56            | F      | Yes    | decreased | increased                         | increased                           | decreased                           | +           | +           | +                | +           |

STM, *Salmonella enterica* Typhimurium; SE, *S. enterica* Enteritidis; M, male; F, female; N/A, Data not available; Hct, hematocrit (normal = 13-18%); Leuk, leukocyte (normal = 5000 – 10000 cells/mm<sup>3</sup>); Neutro, neutrophil (normal = 40-74 cells/mm<sup>3</sup>) and Lympho, lymphocyte (normal = 19-48 cells/mm<sup>3</sup>); +, presence; -, absence

**Supplementary Table 2:** Demographic and clinical data of hospitalized patients with stool or blood culture positive for *Salmonella enterica* Serovar Typhimurium and Enteritidis (7/8).

| Sample ID | Year | Source | Serovar | Age<br>(Year) | Gender | Sepsis | Hct (%)   | Leuk.<br>(cells/mm <sup>3</sup> ) | Neutro.<br>(cells/mm <sup>3</sup> ) | Lympho.<br>(cells/mm <sup>3</sup> ) | <i>spvB</i> | <i>ssel</i> | <i>sodC</i><br>/ | <i>rpoS</i> |
|-----------|------|--------|---------|---------------|--------|--------|-----------|-----------------------------------|-------------------------------------|-------------------------------------|-------------|-------------|------------------|-------------|
| CNTS297   | 2020 | Stool  | SE      | 6             | M      | N/A    | N/A       | N/A                               | N/A                                 | N/A                                 | +           | +           | +                | +           |
| CNTS298   | 2020 | Stool  | STM     | 34            | F      | No     | decreased | decreased                         | normal                              | normal                              | -           | -           | -                | +           |
| CNTS305   | 2020 | Stool  | STM     | 37            | M      | N/A    | N/A       | N/A                               | N/A                                 | N/A                                 | -           | +           | +                | +           |
| CNTS306   | 2020 | Stool  | STM     | 52            | M      | No     | decreased | decreased                         | normal                              | normal                              | -           | +           | +                | +           |
| CNTS307   | 2020 | Stool  | STM     | 28            | F      | No     | decreased | normal                            | increased                           | decreased                           | -           | +           | +                | +           |
| CNTS308   | 2020 | Stool  | STM     | 85            | F      | No     | decreased | decreased                         | normal                              | normal                              | -           | -           | -                | +           |
| CNTS309   | 2020 | Stool  | SE      | 1             | F      | N/A    | N/A       | N/A                               | N/A                                 | N/A                                 | +           | +           | +                | +           |
| CNTS310   | 2020 | Stool  | STM     | 48            | M      | Yes    | decreased | increased                         | increased                           | decreased                           | -           | -           | -                | +           |
| CNTS311   | 2020 | Stool  | STM     | 13            | M      | Yes    | decreased | decreased                         | decreased                           | normal                              | -           | +           | +                | +           |
| CNTS318   | 2020 | Stool  | STM     | 0.58          | F      | Yes    | decreased | increased                         | decreased                           | increased                           | -           | +           | +                | +           |
| CNTS325   | 2020 | Stool  | STM     | 68            | F      | No     | decreased | normal                            | normal                              | normal                              | -           | +           | +                | +           |
| CNTS333   | 2020 | Stool  | STM     | 1             | M      | Yes    | decreased | decreased                         | normal                              | increased                           | -           | +           | +                | +           |
| CNTS338   | 2020 | Stool  | STM     | 84            | M      | No     | decreased | decreased                         | normal                              | normal                              | -           | -           | -                | +           |
| CNTS341   | 2020 | Stool  | STM     | 50            | M      | No     | decreased | normal                            | increased                           | decreased                           | -           | +           | +                | +           |
| CNTS360   | 2021 | Stool  | STM     | 1             | M      | Yes    | decreased | decreased                         | increased                           | decreased                           | -           | +           | +                | +           |
| CNTS361   | 2021 | Stool  | STM     | 22            | F      | No     | decreased | decreased                         | increased                           | decreased                           | +           | +           | +                | +           |
| CNTS363   | 2021 | Stool  | STM     | 52            | M      | Yes    | decreased | increased                         | increased                           | normal                              | -           | +           | +                | +           |
| CNTS364   | 2021 | Stool  | STM     | 23            | F      | No     | decreased | increased                         | normal                              | normal                              | -           | -           | -                | +           |
| CNTS367   | 2021 | Stool  | SE      | 46            | F      | No     | decreased | normal                            | normal                              | normal                              | +           | +           | +                | +           |
| CNTS368   | 2021 | Stool  | STM     | 1             | M      | Yes    | decreased | decreased                         | increased                           | decreased                           | -           | +           | +                | +           |

STM, *Salmonella enterica* Typhimurium; SE, *S. enterica* Enteritidis; M, male; F, female; N/A, Data not available; Hct, hematocrit (normal = 13-18%); Leuk, leukocyte (normal = 5000 – 10000 cells/mm<sup>3</sup>); Neutro, neutrophil (normal = 40-74 cells/mm<sup>3</sup>) and Lympho, lymphocyte (normal = 19-48 cells/mm<sup>3</sup>); +, presence; -, absence



**Supplementary Table 2:** Demographic and clinical data of hospitalized patients with stool or blood culture positive for *Salmonella enterica* Serovar Typhimurium and Enteritidis (8/8).

| Sample ID | Year | Source | Serovar | Age<br>(Year) | Gender | Sepsis | Hct (%)   | Leuk.<br>(cells/mm <sup>3</sup> ) | Neutro.<br>(cells/mm <sup>3</sup> ) | Lympho.<br>(cells/mm <sup>3</sup> ) | <i>spvB</i> | <i>ssel</i> | <i>sodC</i><br>/ | <i>rpoS</i> |
|-----------|------|--------|---------|---------------|--------|--------|-----------|-----------------------------------|-------------------------------------|-------------------------------------|-------------|-------------|------------------|-------------|
| CNTS372   | 2021 | Stool  | STM     | 54            | F      | Yes    | decreased | increased                         | increased                           | decreased                           | -           | +           | +                | +           |
| CNTS377   | 2021 | Blood  | SE      | 71            | M      | Yes    | decreased | normal                            | increased                           | decreased                           | +           | +           | +                | +           |
| CNTS378   | 2021 | Stool  | STM     | 2             | M      | N/A    | N/A       | N/A                               | N/A                                 | N/A                                 | +           | +           | +                | +           |
| CNTS388   | 2021 | Stool  | STM     | 1             | F      | N/A    | N/A       | N/A                               | N/A                                 | N/A                                 | -           | +           | +                | +           |
| CNTS389   | 2021 | Stool  | STM     | 33            | F      | No     | normal    | normal                            | normal                              | normal                              | -           | +           | +                | +           |
| CNTS393   | 2021 | Stool  | STM     | 68            | M      | No     | decreased | normal                            | normal                              | normal                              | -           | +           | +                | +           |
| CNTS394   | 2021 | Stool  | STM     | 1             | M      | N/A    | N/A       | N/A                               | N/A                                 | N/A                                 | -           | -           | -                | +           |
| CNTS395   | 2021 | Blood  | SE      | 56            | F      | Yes    | decreased | increased                         | normal                              | normal                              | +           | +           | +                | +           |

STM, *Salmonella enterica* Typhimurium; SE, *S. enterica* Enteritidis; M, male; F, female; N/A, Data not available; Hct, hematocrit (normal = 13-18%); Leuk, leukocyte (normal = 5000 – 10000 cells/mm<sup>3</sup>); Neutro, neutrophil (normal = 40-74 cells/mm<sup>3</sup>) and Lympho, lymphocyte (normal = 19-48 cells/mm<sup>3</sup>); +, presence; -, absence

**Supplementary Table 3:** The source, antibiotic resistance pattern, multiple antibiotic resistance (MAR) index, and virulence gene profiles of 6 ESBL-positive *S. Typhimurium* isolates.

| Isolate # | Sample ID | Source | Antibiotic resistance pattern                     | MAR index | Virulence genes profiles |
|-----------|-----------|--------|---------------------------------------------------|-----------|--------------------------|
| 1         | CNTS005   | blood  | S-AMP-TE-DO-CTX-CXM-CIP-FEP-CRO-ATM-CAZ-KZ-NA     | 0.54      | <i>ssel-sodCl-rpoS</i>   |
| 2         | CNTS017   | stool  | S-AMP-TE-DO-CTX-CXM-FEP-CRO-ATM-CAZ-KZ-DOR-STX    | 0.54      | <i>ssel-sodCl-rpoS</i>   |
| 3         | CNTS028   | blood  | S-AMP-TE-DO-CTX-CXM-FEP- CRO-ATM-CAZ- KZ-         | 0.46      | <i>ssel-sodCl-rpoS</i>   |
| 4         | CNTS089   | stool  | S-AMP-TE-DO-CTX-CXM-FEP-CRO-ATM-CAZ-KZ            | 0.46      | <i>ssel-sodCl-rpoS</i>   |
| 5         | CNTS091   | stool  | S-TE-DO-CTX-CXM-FEP-CRO- ATM-CAZ- KZ-             | 0.42      | <i>sodCl-rpoS</i>        |
| 6         | CNTS098   | stool  | S-AMP-TE-DO-CTX-CXM-CIP- FEP-CRO-ATM- CAZ- KZ-STX | 0.54      | <i>sodCl-rpoS</i>        |

**Supplementary Table 4:** The multiple antibiotic resistance (MAR) index of each *S. Typhimurium* isolate (N = 120)

| <b>Sample ID</b> | <b>MAR Index</b> | <b>Sample ID</b> | <b>MAR Index</b> | <b>Sample ID</b> | <b>MAR Index</b> |
|------------------|------------------|------------------|------------------|------------------|------------------|
| CNTS005          | 0.54             | CNTS090          | 0.17             | CNTS227          | 0.17             |
| CNTS012          | 0.17             | CNTS091          | 0.42             | CNTS231          | 0.21             |
| CNTS016          | 0.25             | CNTS093          | 0.00             | CNTS233          | 0.00             |
| CNTS017          | 0.54             | CNTS094          | 0.00             | CNTS237          | 0.00             |
| CNTS019          | 0.58             | CNTS097          | 0.25             | CNTS238          | 0.13             |
| CNTS023          | 0.21             | CNTS098          | 0.54             | CNTS240          | 0.21             |
| CNTS028          | 0.46             | CNTS099          | 0.42             | CNTS246          | 0.54             |
| CNTS029          | 0.21             | CNTS100          | 0.29             | CNTS252          | 0.21             |
| CNTS031          | 0.29             | CNTS101          | 0.58             | CNTS255          | 0.29             |
| CNTS032          | 0.25             | CNTS103          | 0.58             | CNTS259          | 0.21             |
| CNTS037          | 0.04             | CNTS107          | 0.58             | CNTS277          | 0.13             |
| CNTS039          | 0.17             | CNTS113          | 0.21             | CNTS281          | 0.17             |
| CNTS040          | 0.21             | CNTS114          | 0.25             | CNTS282          | 0.21             |
| CNTS041          | 0.21             | CNTS118          | 0.08             | CNTS285          | 0.13             |
| CNTS045          | 0.08             | CNTS119          | 0.29             | CNTS289          | 0.29             |
| CNTS046          | 0.17             | CNTS123          | 0.13             | CNTS290          | 0.04             |
| CNTS047          | 0.25             | CNTS125          | 0.58             | CNTS291          | 0.25             |
| CNTS048          | 0.00             | CNTS126          | 0.21             | CNTS298          | 0.21             |
| CNTS049          | 0.04             | CNTS133          | 0.21             | CNTS305          | 0.17             |
| CNTS050          | 0.13             | CNTS135          | 0.25             | CNTS306          | 0.17             |
| CNTS053          | 0.17             | CNTS139          | 0.21             | CNTS307          | 0.04             |
| CNTS055          | 0.25             | CNTS141          | 0.13             | CNTS308          | 0.04             |
| CNTS056          | 0.17             | CNTS144          | 0.25             | CNTS310          | 0.04             |
| CNTS058          | 0.63             | CNTS147          | 0.13             | CNTS311          | 0.21             |
| CNTS060          | 0.29             | CNTS156          | 0.00             | CNTS318          | 0.25             |
| CNTS064          | 0.00             | CNTS163          | 0.17             | CNTS325          | 0.25             |
| CNTS065          | 0.21             | CNTS167          | 0.17             | CNTS333          | 0.04             |
| CNTS068          | 0.21             | CNTS171          | 0.17             | CNTS338          | 0.13             |
| CNTS069          | 0.21             | CNTS172          | 0.63             | CNTS341          | 0.08             |
| CNTS070          | 0.21             | CNTS174          | 0.33             | CNTS360          | 0.13             |
| CNTS071          | 0.21             | CNTS183          | 0.21             | CNTS361          | 0.21             |
| CNTS073          | 0.21             | CNTS185          | 0.25             | CNTS363          | 0.08             |
| CNTS075          | 0.25             | CNTS195          | 0.25             | CNTS364          | 0.04             |
| CNTS078          | 0.63             | CNTS199          | 0.17             | CNTS368          | 0.08             |
| CNTS080          | 0.29             | CNTS206          | 0.21             | CNTS372          | 0.08             |
| CNTS081          | 0.58             | CNTS209          | 0.17             | CNTS378          | 0.08             |
| CNTS083          | 0.29             | CNTS214          | 0.29             | CNTS388          | 0.08             |
| CNTS085          | 0.21             | CNTS219          | 0.13             | CNTS389          | 0.08             |
| CNTS086          | 0.17             | CNTS222          | 0.25             | CNTS393          | 0.17             |
| CNTS089          | 0.46             | CNTS226          | 0.21             | CNTS394          | 0.21             |
|                  |                  |                  |                  | <b>Average</b>   | <b>0.22</b>      |

**Supplementary Table 5:** The multiple antibiotic resistance (MAR) index of each *S. Enteritidis* isolate (N = 28)

| <b>Sample ID</b> | <b>MAR Index</b> |
|------------------|------------------|
| CNTS009          | 0.08             |
| CNTS010          | 0.00             |
| CNTS020          | 0.08             |
| CNTS024          | 0.04             |
| CNTS030          | 0.04             |
| CNTS059          | 0.04             |
| CNTS074          | 0.08             |
| CNTS105          | 0.08             |
| CNTS109          | 0.17             |
| CNTS112          | 0.25             |
| CNTS115          | 0.04             |
| CNTS161          | 0.08             |
| CNTS177          | 0.04             |
| CNTS182          | 0.04             |
| CNTS191          | 0.04             |
| CNTS194          | 0.13             |
| CNTS200          | 0.00             |
| CNTS210          | 0.00             |
| CNTS230          | 0.00             |
| CNTS251          | 0.00             |
| CNTS261          | 0.00             |
| CNTS270          | 0.00             |
| CNTS272          | 0.00             |
| CNTS297          | 0.00             |
| CNTS309          | 0.00             |
| CNTS367          | 0.00             |
| CNTS377          | 0.00             |
| CNTS395          | 0.00             |
| <b>Average</b>   | <b>0.04</b>      |
